# Supplementary material
Source: publisher figshare collection journal article supplement (https://geolsoc.figshare.com/ndownloader/files/35156114)
Supplement: Supplementary file 1 [file 35156114]

## Sheet: Sheet1
Results_export_1	Results_export_2	Results_export_3
Results of Monte Carlo unmixing model
wghtings applied to PDPs and CDFs
number of grains in each trial=	N/A
trials=	10000
percent accepted trials=	1
Cross-correlation cutoff=	0
Kuiper V value cutoff=	1
KS D value cutoff=	1
Cross-correlation	0.758 +/- 0.01				Total Percent Contributions
Sample Names	Relative Contribution	Standard Deviation	Percent		Coahuila	Maya
Santa Rosa/Maya	0.0543261	0.0613261	5.4		83.7	16.2
Baldy Granites/Maya	0.0282405	0.0295175	2.8
Baldy Seds/Maya	0.0481901	0.0563948	4.8
Chicxulub/Maya	0.0160436	0.0152021	1.6
Macal Granites/Maya	0.015541	0.0193008	1.6
PC03/Coahuila	0.814254	0.099555	81.4
La Joya/Coahuila	0.0234048	0.0241871	2.3
Kuiper V value	0.183 +/- 0.008
Sample Names	Relative Contribution	Standard Deviation			Coahuila	Maya
Santa Rosa/Maya	0.0452674	0.0523594	4.5		79.3	20.9
Baldy Granites/Maya	0.026093	0.0271673	2.6
Baldy Seds/Maya	0.0969393	0.0934269	10
Chicxulub/Maya	0.011173	0.01236	1.1
Macal Granites/Maya	0.0270346	0.0295183	2.7
PC03/Coahuila	0.741444	0.124882	74.1
La Joya/Coahuila	0.0520488	0.0683893	5.2
KS D value	0.113 +/- 0.009
Sample Names	Relative Contribution	Standard Deviation
Santa Rosa/Maya	0.0431511	0.0554132
Baldy Granites/Maya	0.0207456	0.0256269
Baldy Seds/Maya	0.0532571	0.0708434
Chicxulub/Maya	0.0100378	0.0102164
Macal Granites/Maya	0.0214456	0.0279969
PC03/Coahuila	0.823482	0.0981032
La Joya/Coahuila	0.027881	0.0335097
